# Supplementary material
Source: Springer Nature journal article supplement (https://www.springermedizin.de/resource/supplementary/12874_2010_606_MOESM1_ESM.pdf/9432574)
Supplement: MOESM1 [file 9432574]

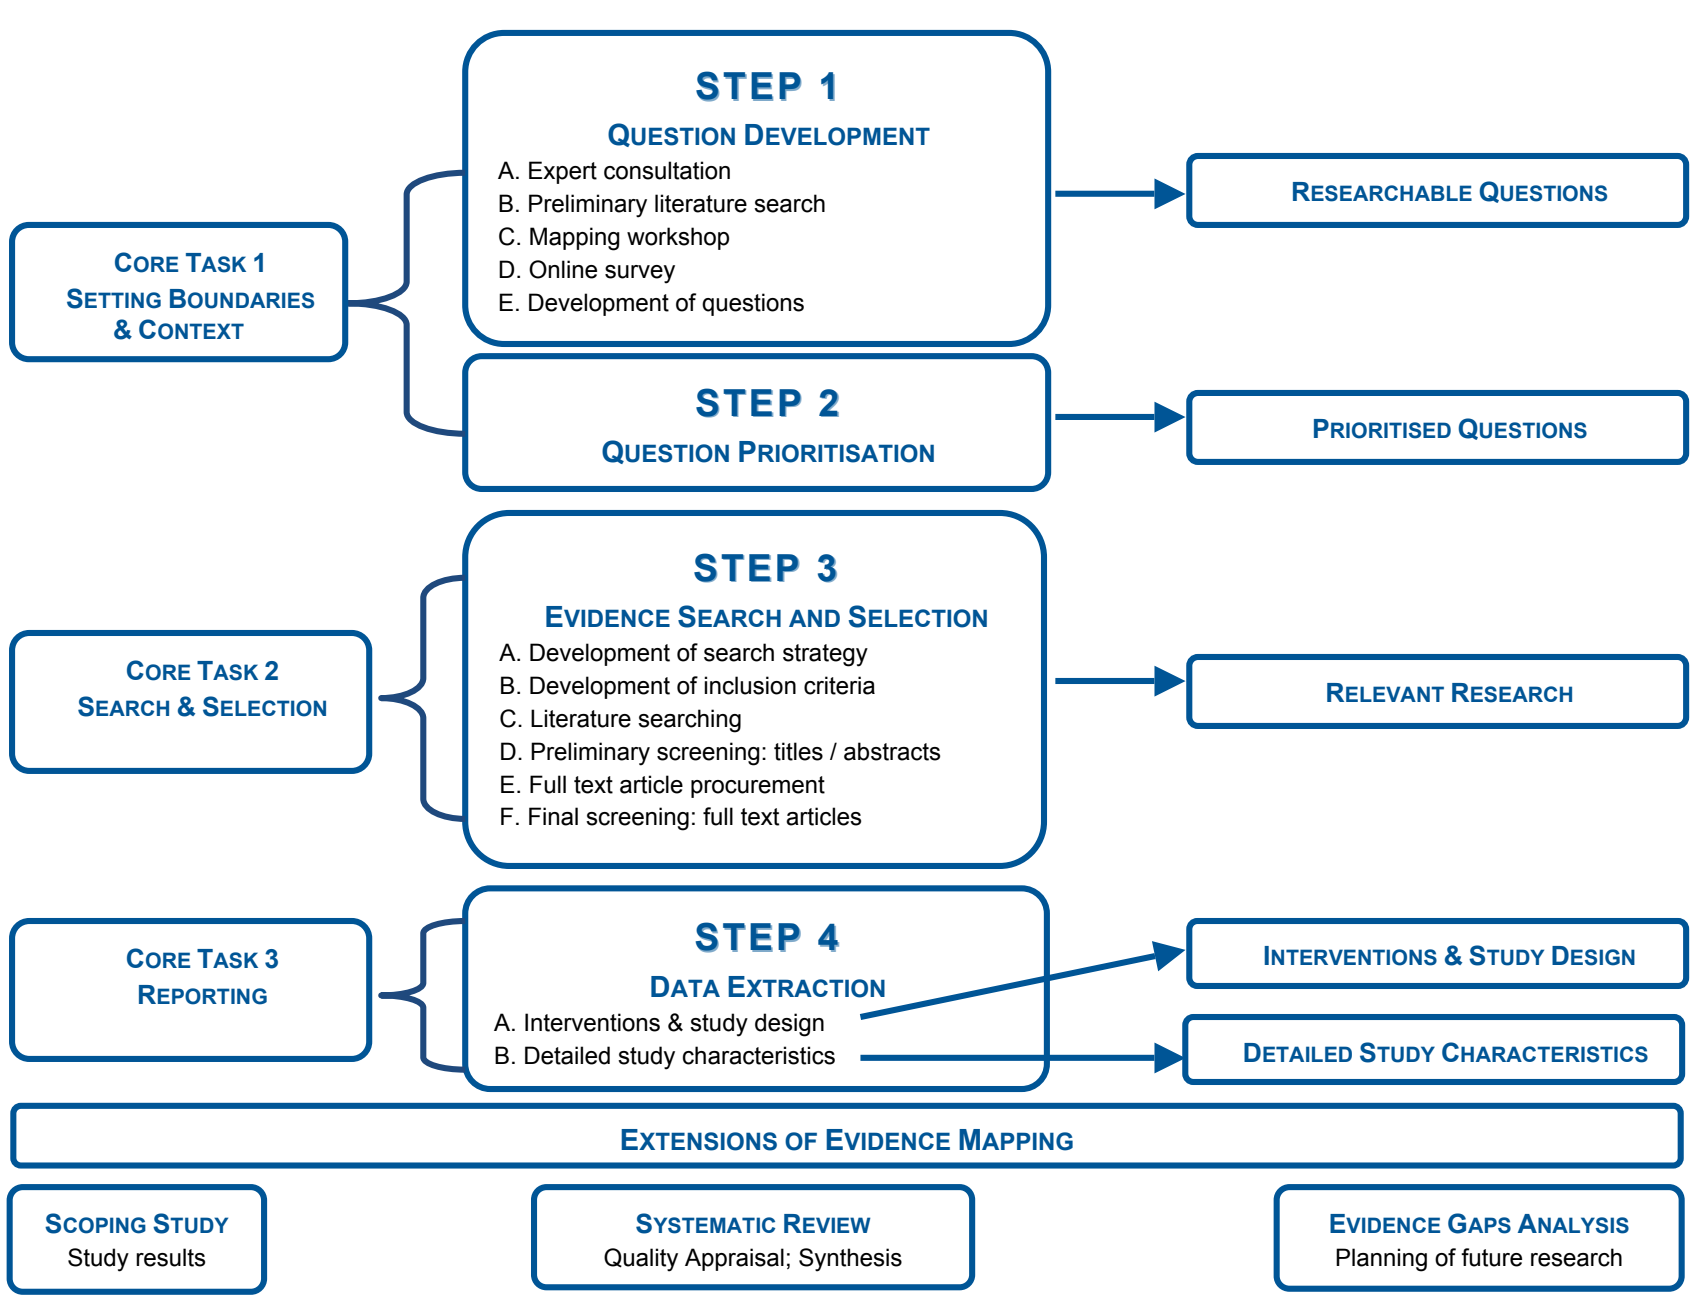

## STEP 1

### QUESTION DEVELOPMENT

- A. Expert consultation
- B. Preliminary literature search
- C. Mapping workshop
- D. Online survey
- E. Development of questions

RESEARCHABLE QUESTIONS

## STEP 2

### QUESTION PRIORITISATION

PRIORITISED QUESTIONS

## STEP 3

### EVIDENCE SEARCH AND SELECTION

- A. Development of search strategy
- B. Development of inclusion criteria
- C. Literature searching
- D. Preliminary screening: titles / abstracts
- E. Full text article procurement
- F. Final screening: full text articles

RELEVANT RESEARCH

## STEP 4

### DATA EXTRACTION

- A. Interventions & study design
- B. Detailed study characteristics

INTERVENTIONS & STUDY DESIGN

DETAILED STUDY CHARACTERISTICS

## EXTENSIONS OF EVIDENCE MAPPING

### SCOPING STUDY

Study results

### SYSTEMATIC REVIEW

Quality Appraisal; Synthesis

### EVIDENCE GAPS ANALYSIS

Planning of future research
